# Supplementary material for: Epithelial GREMLIN1 disrupts intestinal epithelial-mesenchymal crosstalk to induce a wnt-dependent ectopic stem cell niche through stromal remodelling
Source: Springer Nature journal article supplement (doi:10.1038/s41467-025-60364-6), 2025-06-04
Supplement: MOESM2 [file 41467_2025_60364_MOESM2_ESM.pdf]

### **Description of Additional Supplementary Files**

**Supplementary Movie 1.** Alignment and scrolling of serial sections through >120 day old *Sox9-CreER<sup>T2</sup>*; *Rosa26<sup>YFP</sup>*; *Vil1-Grem1* mouse small intestinal gut roll with anti YFP staining (brown) and automated false colorisation of tracing ribbons (green).

**Supplementary Movie 2.** Rotation of reconstructed polyp to show spatial segregation of crypt basal and ectopic crypt lineage tracing ribbons, to exclude interconnection of ribbons in three-dimensional space.
